# Supplementary material for: Ambiguity in logic-based models of gene regulatory networks: An integrative multi-perturbation analysis
Source: PubMed Central journal article supplement (PMC6245684; doi:10.1371/journal.pone.0206976), 2018-11-20
Supplement: pone.0206976.s003.pdf [file pone.0206976.s003.pdf]

**S2 Table. The values of  $P_{fv,s}$  in the cases of DO and DO+PPI. In the case of DO+cis(+PPI),  $P_{fv,s}$  is 1 for all values of  $s$ .**

|       | $s$    | 0    | 1    | 2    | 3    | 4    | 5    | 6    | 7    | 8    | 9    | 10   | 11   | 12   | 13   | 14   | 15   |      |
|-------|--------|------|------|------|------|------|------|------|------|------|------|------|------|------|------|------|------|------|
| $k=4$ | DO     | 0.06 |      |      |      |      |      |      |      |      |      |      |      |      |      |      |      |      |
|       | DO+PPI | 0.06 | 0.06 | 0.06 | 0.25 | 0.06 | 0.25 | 0.25 | 0.50 | 0.06 | 0.25 | 0.25 | 0.50 | 0.25 | 0.50 | 0.50 | 0.50 | 0.94 |
| $k=3$ | DO     | 0.15 |      |      |      |      |      |      |      |      |      |      |      |      |      |      |      |      |
|       | DO+PPI | 0.15 | 0.15 | 0.15 | 0.52 | 0.15 | 0.52 | 0.52 | 0.89 |      |      |      |      |      |      |      |      |      |
| $k=2$ | DO     | 0.4  |      |      |      |      |      |      |      |      |      |      |      |      |      |      |      |      |
|       | DO+PPI | 0.4  | 0.4  | 0.4  | 0.8  |      |      |      |      |      |      |      |      |      |      |      |      |      |
