# Supplementary material for: Ambiguity in logic-based models of gene regulatory networks: An integrative multi-perturbation analysis
Source: PubMed Central journal article supplement (PMC6245684; doi:10.1371/journal.pone.0206976), 2018-11-20
Supplement: pone.0206976.s005.pdf [file pone.0206976.s005.pdf]

S4 Table. The values of  $P_{ua}$  obtained in the ambiguity analysis.

|            | $k = 2$ |      |            | $k = 3$ |      |            | $k = 4$ |         |            |
|------------|---------|------|------------|---------|------|------------|---------|---------|------------|
|            | D, DO   | +PPI | +cis(+PPI) | D, DO   | +PPI | +cis(+PPI) | D, DO   | +PPI    | +cis(+PPI) |
| <b>1D</b>  | 0.05    | 0.15 | 0.45       | 0.001   | 0.01 | 0.03       | 1.9E-6  | 2.9E-5  | 1.6E-4     |
| <b>2D</b>  | 0.1     | 0.2  | 0.5        | 0.005   | 0.04 | 0.08       | 1.5E-5  | 2.4E-4  | 6.1E-4     |
| <b>3D</b>  | -       | -    | -          | 0.009   | 0.08 | 0.12       | 6.2E-5  | 9.61E-4 | 1.6E-3     |
| <b>4D</b>  | -       | -    | -          | -       | -    | -          | 1.2E-4  | 1.9E-3  | 2.7E-3     |
| <b>1DO</b> | 0.2     | 0.3  | 0.8        | 0.009   | 0.03 | 0.07       | 3.1E-5  | 1.5E-4  | 4.9E-4     |
| <b>2DO</b> | 0.4     | 0.5  | <b>1</b>   | 0.04    | 0.12 | 0.33       | 2.5E-4  | 1.2E-3  | 0.004      |
| <b>3DO</b> | -       | -    | -          | 0.07    | 0.25 | 0.71       | 0.001   | 0.005   | 0.016      |
| <b>4DO</b> | -       | -    | -          | 0.15    | 0.38 | <b>1</b>   | 0.004   | 0.02    | 0.07       |
